# Supplementary material for: Long-term aspartame and saccharin intakes are related to greater volumes of visceral, intermuscular, and subcutaneous adipose tissue: the CARDIA study
Source: PubMed Central journal article supplement (PMC10511315; doi:10.1038/s41366-023-01336-y), 2023-07-13
Supplement: 41366_2023_1336_MOESM1_ESM.pdf [file 41366_2023_1336_MOESM1_ESM.pdf]

Supplementary Table 1. Baseline (year 0) demographic, lifestyle, physical and clinical characteristics\* of female and male CARDIA participants across quintiles of aspartame sweetener intake (milligrams/day) (N=3 088).

| Characteristics                              | Quintiles of Baseline Aspartame Intake (mg/day) |               |               |               |               | Trend<br>p-value |
|----------------------------------------------|-------------------------------------------------|---------------|---------------|---------------|---------------|------------------|
|                                              | 1<br>(n=617)                                    | 2<br>(n=618)  | 3<br>(n=618)  | 4<br>(n=618)  | 5<br>(n=617)  |                  |
| Mean intake                                  | 23.3                                            | 38.32         | 54.38         | 81.87         | 200.62        |                  |
| Range                                        | (5.43-31.3)                                     | (31.3-45.5)   | (45.6-85.2)   | (65.3-104.1)  | (>104.1)      |                  |
| <u>Demographics</u>                          |                                                 |               |               |               |               |                  |
| Age, years                                   | 25.1 (0.2)                                      | 25.2 (0.1)    | 25.2 (0.1)    | 25.2(0.2)     | 24.9 (0.2)    | 0.43             |
| Sex, women %                                 | 62.0 (1.9)                                      | 56.1 (1.9)    | 47.8 (1.9)    | 53.8 (1.9)    | 61.7 (1.9)    | 0.62             |
| Race, White                                  | 41.3 (2.0)                                      | 49.2 (1.9)    | 51. (1.9)     | 49.8 (2.0)    | 72.5 (1.9)    | <0.001           |
| Education†                                   | 91.6 (1.1)                                      | 90.9 (1.0)    | 91.4 (1.0)    | 94.0 (1.1)    | 94.8 (1.1)    | 0.006            |
| <u>Lifestyle characteristics</u>             |                                                 |               |               |               |               |                  |
| Current smokers, %                           | 28.2 (1.8)                                      | 26.1 (1.8)    | 28.4 (1.8)    | 26.7 (1.8)    | 25.3 (1.8)    | 0.36             |
| Alcohol status, %                            | 16.7 (1.4)                                      | 12.6 (13.4)   | 12.9 (1.4)    | 12.2 (1.4)    | 11.5 (1.4)    | 0.014            |
| Physical activity score                      | 399.6 (11.5)                                    | 398.1 (11.0)  | 418.2 (11.1)  | 441.9 (11.4)  | 429.1 (11.19) | 0.005            |
| Energy intake, kcal                          | 1620.1 (40.9)                                   | 2019.7 (40.3) | 2448.5 (40.5) | 2835.1 (40.5) | 2203.9 (41.2) | <0.001           |
| HEI-2015 diet quality score                  | 58.7 (0.4)                                      | 61.5 (0.4)    | 62.3 (0.4)    | 62.8 (0.4)    | 60.2 (0.4)    | 0.0004           |
| <u>Physical and Clinical Characteristics</u> |                                                 |               |               |               |               |                  |
| BMI, kg/m <sup>2</sup>                       | 23.9 (0.2)                                      | 23.9 (0.2)    | 24.6 (0.2)    | 24.5 (0.2)    | 25.7 (0.2)    | <0.001           |
| Waist circumference, cm                      | 76.5 (0.4)                                      | 76.3 (0.4)    | 78.0 (0.4)    | 77.5 (0.4)    | 80.2 (0.4)    | <0.001           |
| Insulin, uU/mL                               | 9.8 (0.3)                                       | 10.0 (0.3)    | 10.6 (0.3)    | 10.5 (0.3)    | 11.7 (0.3)    | <0.001           |
| Glucose, mg/100 mL                           | 81.3 (0.5)                                      | 81.7 (0.4)    | 81.7 (0.5)    | 81.9 (0.5)    | 83.3 (0.5)    | 0.003            |

\*Adjusted for age, sex, race, education, and energy intake

† ≥High School (%)

ArtSw=Artificial sweetener

Supplementary Table 2. Baseline (year 0) demographic, lifestyle, physical and clinical characteristics\* of female and male CARDIA participants across quintiles of sucralose intake (milligrams/day) (N=3 088).

| Characteristics                              | Quintiles of Baseline Sucralose Intake (mg/day) |               |               |               |               | Trend<br>p-value |
|----------------------------------------------|-------------------------------------------------|---------------|---------------|---------------|---------------|------------------|
|                                              | 1<br>(n=617)                                    | 2<br>(n=618)  | 3<br>(n=618)  | 4<br>(n=618)  | 5<br>(n=617)  |                  |
| Mean intake                                  | 23.3                                            | 38.3          | 54.4          | 81.9          | 200.6         |                  |
| Range                                        | (5.43-31.3)                                     | (31.3-45.5)   | (45.6-85.2)   | (65.3-104.1)  | (>104.1)      |                  |
| <u>Demographics</u>                          |                                                 |               |               |               |               |                  |
| Age, years                                   | 25.2 (0.2)                                      | 25.3 (0.1)    | 25.1 (0.1)    | 25.0 (0.1)    | 25.0 (0.2)    | 0.19             |
| Sex, women %                                 | 57.8 (1.9)                                      | 53.2 (1.9)    | 57.7 (1.8)    | 51.1 (1.9)    | 61.3 (2.0)    | 0.47             |
| Race, White                                  | 56.1 (2.0)                                      | 54.8 (1.9)    | 57.0 (1.9)    | 45.5 (1.9)    | 50.4 (2.1)    | 0.003            |
| Education†                                   | 91.2 (1.1)                                      | 92.0 (1.1)    | 93.4 (1.0)    | 93.8 (1.1)    | 92.2 (1.1)    | 0.31             |
| <u>Lifestyle characteristics</u>             |                                                 |               |               |               |               |                  |
| Current smokers, %                           | 30.0 (1.8)                                      | 26.0 (1.8)    | 27.3 (1.7)    | 26.2 (1.8)    | 25.2 (1.9)    | 0.14             |
| Alcohol status, %                            | 13.8 (1.4)                                      | 10.6 (1.4)    | 11.8 (1.3)    | 14.4 (1.4)    | 15.6 (1.4)    | 0.12             |
| Physical activity score                      | 412.5 (11.4)                                    | 408.8 (11.1)  | 424.1 (10.9)  | 420.7 (11.1)  | 420.8 (11.7)  | 0.47             |
| Energy intake, kcal                          | 1635.6 (39.3)                                   | 1842.0 (38.9) | 2190.1 (38.9) | 2469.9 (39.2) | 2990.3 (39.3) | <0.001           |
| HEI-2015 diet quality score                  | 60.5 (0.38)                                     | 61.9 (0.4)    | 61.2 (0.4)    | 61.1 (0.4)    | 60.6 (0.4)    | 0.62             |
| <u>Physical and Clinical Characteristics</u> |                                                 |               |               |               |               |                  |
| BMI, kg/m <sup>2</sup>                       | 24.4 (0.2)                                      | 24.0 (0.2)    | 24.4 (0.2)    | 25.7 (0.2)    | 25.1 (0.2)    | 0.003            |
| Waist circumference, cm                      | 77.2 (0.4)                                      | 76.4 (0.4)    | 77.8(0.4)     | 78.2 (0.4)    | 78.9 (0.4)    | <0.001           |
| Insulin, uU/mL                               | 10.2 (0.3)                                      | 10.1 (0.3)    | 10.3 (0.3)    | 10.9 (0.3)    | 11.2 (0.3)    | 0.01             |
| Glucose, mg/100 mL                           | 82.7 (0.5)                                      | 81.6 (0.5)    | 81.8 (0.4)    | 81.9 (0.5)    | 81.9 (0.5)    | 0.39             |

\*Adjusted for age, sex, race, education, and energy intake

† ≥High School (%)

ArtSw=Artificial sweetener

Supplementary Table 3. Baseline (year 0) demographic, lifestyle, physical and clinical characteristics\* of female and male CARDIA participants across tertiles of saccharin intake (milligrams/day) (N=3 088).

|                                              | Tertiles of Averaged Saccharin Intake (mg/day) |               |               | <i>Trend p-value</i> |
|----------------------------------------------|------------------------------------------------|---------------|---------------|----------------------|
|                                              | 1<br>(n=1919)                                  | 2<br>(n=597)  | 3<br>(n=592)  |                      |
| Mean intake                                  | 0                                              | 6.0           | 65.6          |                      |
| Range                                        |                                                | (>0-17.1)     | (>17.1)       |                      |
| <u>Demographics</u>                          |                                                |               |               |                      |
| Age, years                                   | 25.0 (0.1)                                     | 25.6 (0.3)    | 25.29(0.12)   | 0.04                 |
| Sex, women %                                 | 49.7 (1.1)                                     | 64.3 (3.9)    | 67.27(1.47)   | <0.001               |
| Race, White                                  | 42.4 (1.1)                                     | 47.8 (3.9)    | 72.66(1.46)   | <0.001               |
| Education†                                   | 91.7 (0.6)                                     | 93.69(2.20)   | 93.88(8.39)   | 0.04                 |
| <u>Lifestyle characteristics</u>             |                                                |               |               |                      |
| Current smokers, %                           | 29.4 (1.01)                                    | 19.7 (1.9)    | 25.8 (1.8)    | 0.097                |
| Alcohol status, %                            | 13.6 (0.78)                                    | 15.0 (1.4)    | 10.4 (1.4)    | 0.05                 |
| Physical activity score                      | 387.5 (6.33)                                   | 455.9 (11.6)  | 475.7 (11.3)  | <0.001               |
| Energy intake, kcal                          | 2300.9 (25.13)                                 | 2118.9 (92.0) | 2099.6 (35.0) | <0.001               |
| HEI-2015 diet quality score                  | 60.2 (0.22)                                    | 62.8 (0.8)    | 62.4 (0.3)    | <0.001               |
| <u>Physical and Clinical Characteristics</u> |                                                |               |               |                      |
| BMI, kg/m <sup>2</sup>                       | 24.1 (0.1)                                     | 24.8 (0.2)    | 25.7 (0.2)    | <0.001               |
| Waist circumference, cm                      | 77.0 (0.2)                                     | 78.1 (0.4)    | 79.6 (0.4)    | <0.001               |
| Insulin, uU/mL                               | 10.1 (0.2)                                     | 11.0 (0.3)    | 11.5 (0.3)    | <0.001               |
| Glucose, mg/100 mL                           | 81.8 (0.3)                                     | 82.1 (0.5)    | 82.4 (0.5)    | 0.26                 |

\*Adjusted for age, sex, race, education, and energy intake

† ≥High School (%)

ArtSw=Artificial sweetener

Supplementary Table 4. Adjusted mean (SE) year 25 adipose tissue volumes and anthropometric measures of female and male CARDIA participants across quintiles of averaged sucralose intake (mg/day at years 0, 7, and 20) (N=3 088).

| Characteristic                  | Quintiles of Averaged Sucralose Intake, mg/day |             |             |             |               | Trend p-value |
|---------------------------------|------------------------------------------------|-------------|-------------|-------------|---------------|---------------|
|                                 | 1 (n=617)                                      | 2 (n= 618)  | 3 (n= 618)  | 4 (n= 618)  | 5 (n= 617)    |               |
| Mean intake                     | 14.1 (3.6)                                     | 22.9 (2.2)  | 31.5 (2.9)  | 45.3 (5.4)  | 276.7 (600.6) |               |
| Range                           | (0-19.1)                                       | (19.1-26.7) | (26.7-37.1) | (37.1-56.3) | (≥56.3)       |               |
| <u>Adipose outcome</u>          |                                                |             |             |             |               |               |
| VAT (mL)                        | 131.2 (2.3)                                    | 130.0 (2.2) | 131.4 (2.2) | 134.8 (2.2) | 133.1 (2.3)   | 0.27          |
| SAT (mL)                        | 335.3 (4.9)                                    | 326.7(4.7)  | 332.8 (4.6) | 337.5 (4.7) | 344.7 (4.9)   | 0.07          |
| IMAT (mL)                       | 2.3 (0.06)                                     | 2.31 (0.05) | 2.34 (0.05) | 2.45 (0.05) | 2.40 (0.06)   | 0.16          |
| <u>Anthropometry</u>            |                                                |             |             |             |               |               |
| BMI (kg/m <sup>2</sup> )        | 30.2 (0.2)                                     | 29.8 (0.2)  | 30.2 (0.2)  | 30.5 (0.2)  | 30.8 (0.2)    | 0.004         |
| Weight (lb)                     | 192.3 (1.3)                                    | 190.0 (1.2) | 193.0 (1.2) | 194.8 (1.2) | 197.3 (1.3)   | <0.001        |
| WC (cm)                         | 94.5 (0.5)                                     | 93.8 (0.5)  | 94.5 (0.4)  | 95.1 (0.5)  | 95.4 (0.5)    | 0.05          |
| <u>25-year change*</u>          |                                                |             |             |             |               |               |
| BMI change (kg/m <sup>2</sup> ) | 5.6 (0.2)                                      | 5.8 (0.2)   | 5.9 (0.2)   | 5.7 (0.2)   | 5.8 (0.2)     | 0.5           |
| Weight gain (lb)                | 35.3 (1.4)                                     | 36.9 (1.3)  | 37.9 (1.3)  | 36.5 (1.3)  | 37.5 (1.4)    | 0.4           |
| WC change (cm)                  | 16.7 (0.5)                                     | 17.3 (0.5)  | 17.2 (0.5)  | 16.9 (0.5)  | 16.7 (0.5)    | 0.8           |

Models adjusted for age, sex, race, field center, education, height, smoking, alcohol consumption status, physical activity, energy intake, and HEI2015 score

\*Change in BMI, weight, and WC were also adjusted for baseline BMI, weight, or WC as appropriate.

CARDIA = Coronary Artery Risk Development in Young Adults; VAT=visceral adipose tissue; SAT=subcutaneous adipose tissue; IMAT= intermuscular adipose tissue; HEI2015 = healthy eating index-2015; BMI = body mass index; WC=waist circumference

Supplementary Table 5. Risk of incident obesity associated with artificial sweetener and diet beverage intakes [hazard ratios (95% CIs)] over a median 17.5-year period among CARDIA participants (N=2 745, n events=1 142).

| ArtSw exposure | Categories of ArtSw exposure |                   |                   |                   |                   | <i>p</i> for trend |
|----------------|------------------------------|-------------------|-------------------|-------------------|-------------------|--------------------|
|                | 1                            | 2                 | 3                 | 4                 | 5                 |                    |
| Total ArtSw    | Ref                          | 1.04 (0.87, 1.23) | 1.24 (1.05, 1.46) | 1.28 (1.07, 1.52) | 1.78 (1.51, 2.09) | <0.001             |
| Aspartame      | Ref                          | 1.05 (0.89, 1.24) | 1.21 (1.02, 1.44) | 1.17 (0.98, 1.41) | 1.64 (1.39, 1.93) | <0.001             |
| Sucralose      | Ref                          | 0.92 (0.78, 1.09) | 1.01 (0.85, 1.19) | 1.08 (0.91, 1.28) | 1.18 (0.99, 1.40) | 0.018              |
| Diet soda      | Ref                          | 1.01 (0.85, 1.20) | 1.17 (0.99, 1.39) | 1.30 (1.10, 1.53) | 1.57 (1.34, 1.85) | <0.001             |
| Saccharin*     | Ref                          | 1.13 (1.06, 1.20) | 1.19 (1.13,1.26)  |                   |                   | 0.13               |

Cox regression models adjusted for age, sex, race, field center, education, height, smoking, alcohol consumption status, physical activity, energy intake, and HEI2015 score

\*Saccharin was analysed by tertiles due to the high number of individuals with no reported saccharin intake

CARDIA = Coronary Artery Risk Development in Young Adults; ArtSw=artificial sweetener; VAT=visceral adipose tissue; SAT=subcutaneous adipose tissue; IMAT= intermuscular adipose tissue; HEI2015 = healthy eating index-2015; BMI = body mass index; WC=waist circumference
